1 **Distinct dimensions of emotion in the human brain and their representation on the cortical**  
2 **surface**

3 Naoko Koide-Majima<sup>1</sup>, Tomoya Nakai<sup>2,3</sup> and Shinji Nishimoto<sup>2,3,4,\*</sup>

4

5 1. Brother Industries Ltd., Aichi, Japan

6 2. Center for Information and Neural Networks (CiNet), National Institute of Information and Communications  
7 Technology, Osaka, Japan

8 3. Graduate School of Frontier Biosciences, Osaka University, Osaka, Japan

9 4. Graduate School of Medicine, Osaka University, Osaka, Japan

10

11 \*Corresponding author

12 Shinji Nishimoto

13 Center for Information and Neural Networks, National Institute of Information and Communications Technology  
14 Yamadaoka 1-4, Suita, Osaka 565-0871, Japan

15 E-mail address: nishimoto@nict.go.jp

16 Phone Number: +81-80-9098-3254

17

18

19 **Abstract**

20 We experience a rich variety of emotions in daily life. While previous emotion studies focused on only a few  
21 predefined, restricted emotional states, a recent psychological study found a rich emotional representation in  
22 humans using a large set of diverse human-behavioural data. However, no representation of emotional states in the  
23 brain using emotion labels has been established on such a scale. To examine that, we used functional MRI to  
24 measure blood-oxygen-level-dependent (BOLD) responses when human subjects watched 3-h emotion-inducing  
25 movies labelled with 10,800 ratings regarding each of 80 emotion categories. By quantifying canonical correlations  
26 between BOLD responses and emotion ratings for the movie scenes, we found 25 significant dimensions of  
27 emotion representation in the brain. Then, we constructed a semantic space of the emotion representation and  
28 mapped the emotion categories on the cortical surface. We found that the emotion categories were smoothly  
29 represented from unimodal to transmodal regions on the cortical surface. This paper presents a cortical  
30 representation of a rich variety of emotion categories, which covers most of the emotional states suggested in  
31 traditional theories.

32

### 33 Introduction

34 A central topic in affective neuroscience is to clarify how emotions are represented in the human brain. Recent  
35 functional magnetic resonance imaging (fMRI) studies have addressed this issue by showing brain representations  
36 of specific emotional states<sup>1-8</sup>. However, the results were not sufficient to establish a brain representation of all of  
37 the emotional states that we experience because the emotional states were confined to those defined in the  
38 traditional emotion theories.

39 Traditionally, two main theories regarding the constitution of emotion have been postulated: One is the  
40 basic (categorical) emotion theory, which posits that emotional states can be explained by distinct categories of a  
41 few to 15 basic emotions (e.g. ‘fear’, ‘sadness’, ‘happiness’)<sup>9-13</sup>. These categories have often been used in a  
42 hierarchical structure (e.g. featuring ‘anger’-related subcategories of emotions such as ‘annoyance’ and ‘fury’).  
43 However, when using this structure, it is difficult to represent the fuzzy boundaries among such emotion families<sup>14</sup>.  
44 The other theory is the affective-dimension theory, in which emotion is explained in a continuous space consisting  
45 of a few dimensions (e.g. ‘arousal’ and ‘valence’)<sup>14-17</sup>. However, such a low-dimensional model is inadequate to  
46 account for differences among multiple emotional categories such as anger and fear<sup>18</sup>.

47 A recent study addressed the problems regarding the discriminability of the traditional emotion theories  
48 and provided a more natural interpretation of emotion by constructing a semantic space of emotion from reports of  
49 emotional experiences<sup>19</sup>. The authors collected emotion categories, affective dimensions and free affective words  
50 for each of 2,185 movie clips. By examining the correlations and predictability between the rating types, the  
51 authors found 27 independent dimensions of specific emotion categories. The number of emotion dimensions, 27,  
52 is a richer variety of emotional states than in the traditional emotion theories. This behavioural observation suggests  
53 that the use of movie clips would enable us to measure brain activity associated with a rich variety of emotions.

54 To provide a comprehensive understanding of the brain representation of emotion, we used fMRI to  
55 measure blood-oxygen-level-dependent (BOLD) responses from eight subjects while they watched 3-h movies  
56 consisting of 720 clips that were selected to induce various types of emotion. The movies were rated regarding each  
57 of 80 emotion categories (see Methods), which constitutes greater variety than used in the previous fMRI studies<sup>1-  
58 8</sup>. Using the emotion ratings, first, we examined the number of significant dimensions having high correlations  
59 between emotion ratings and the BOLD responses (see Methods). For each voxel, we estimated the BOLD  
60 responses to each of the 80 emotion categories by using a regularised linear regression. We constructed a semantic  
61 space consisting of dimensions of response patterns to represent the 80 emotion categories. Then, we performed a  
62 factor rotation analysis to give the interpretation of the dimensions and showed the cortical gradient of each voxel’s  
63 factor loadings.

64

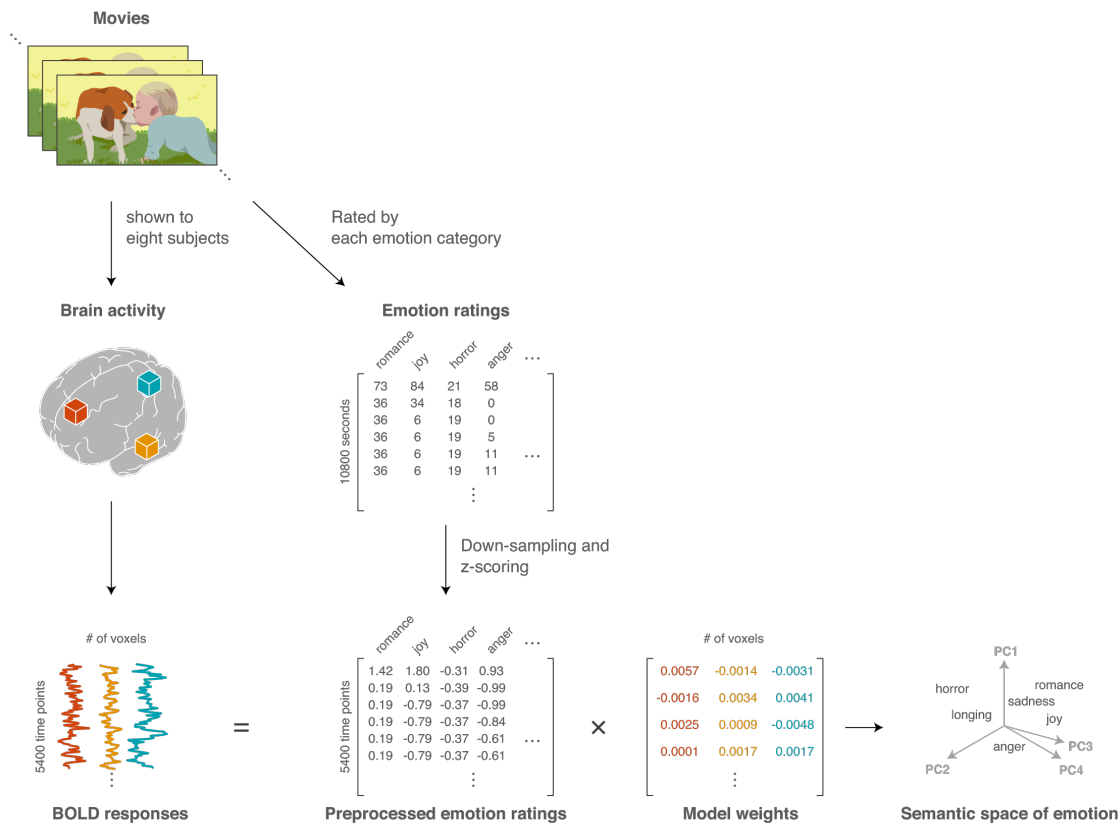

65

66 Figure 1. Schematic of experiment and procedure for constructing a semantic space of emotion. BOLD responses  
 67 for eight subjects were measured while they watched emotion-inducing movies for 3 h. Each movie scene was rated  
 68 regarding 80 emotion categories. Voxel-wise response was modelled as a linear weighted sum of the emotion  
 69 ratings using an L2-regularised regression procedure. A semantic space was constructed by performing a dimension  
 70 reduction on the estimated model weights.

71

72

## 73 Result

### 74 Twenty-five dimensions of emotion ratings were significantly correlated with the BOLD 75 responses

76 First, we revealed significant dimensions of emotion ratings that were correlated with the BOLD responses. For this  
 77 purpose, we used a canonical correlation analysis (CCA) between the ratings (3,600 time points  $\times$  80 dimensions)  
 78 and the BOLD responses (3,600 time points  $\times$  3,984–13,068 voxels per subject) of the training dataset from each of  
 79 the eight subjects (S1–S8), where factor loadings for each of the ratings and the responses were estimated to have  
 80 the maximum correlation between them (see Methods). Then, we tested whether factor loadings showed a  
 81 significant correlation ( $p < 0.01$ , with Bonferroni correction for 80 emotion categories) for each dimension of the  
 82 ratings, using a test dataset of the ratings (1,800 time points  $\times$  80 dimensions) and the responses (1,800 time points  
 83  $\times$  3,984–13,068 voxels per subject). The results revealed 19–32 significant dimensions across subjects (S1: 20; S2:

84 27; S3: 25; S4: 28; S5: 23; S6: 32; S7: 24; S8: 19). The median was 24.75. We employed 25 dimensions in the next  
85 analysis to construct a semantic space of emotion.

86

### 87 **A semantic space shows brain representation of 80 emotion categories**

88 To construct the semantic space of emotion, we used a dimensionality reduction technique on the BOLD-response  
89 patterns to 80 emotion categories for all the subjects. First, we concatenated estimated weights from individual  
90 subjects ( $80 \times 18,684\text{--}34,066$  voxels per subject). Then, we performed a principal component analysis (PCA) on  
91 the concatenated weights while treating the emotion categories and voxels as dimensions and samples, and reduced  
92 the dimensionality from the original 80 to 25. The semantic space of emotion was defined as the space consisting of  
93 the 25 dimensions. To maintain the quality of the semantic space, we only used voxels with high prediction  
94 performance of the regression model (see Methods).

95 In the semantic space of emotion, the distance for each pair of emotions represents the dissimilarity in the  
96 BOLD-response patterns between them. Fig. 2a shows the semantic space projected into the two-dimensional  
97 space, maintaining the emotion-pair distances in the 25-dimensional space as much as possible. In this space,  
98 positive and negative emotions are separated. As supporting results, we labelled each emotion in the semantic space  
99 as a positive, negative, or ambiguous emotion based on the emotion-word hierarchy of WordNet-Affect<sup>20</sup> (Fig.  
100 S1a). There, intra-class emotion labels are located close to each other. This tendency is quantitatively confirmed by  
101 using a random permutation test (Fig. S1b).

102 To interpret each principal component of the semantic space, we performed varimax factor rotation (Fig. 2b).  
103 The results showed that each factor had high weights for related emotion categories such as ‘fear’ and ‘horror’. Fig.  
104 2c shows factor loadings for the four representative factors, where the top-left factor (ID1) contains high weights in  
105 ‘Disgust-related’ emotions such as ‘disgust’, ‘empathic pain’ and ‘fear’. The top-right factor (ID2) contains high  
106 weights in ‘Awkwardness-related’ emotions such as ‘awkwardness’ and ‘laughing’. The bottom-left factor (ID4)  
107 contains high weights in ‘Sexual-desire-related’ emotions such as ‘sexual-desire’, ‘sexiness’ and ‘levity’. The  
108 bottom-right factor (ID19) contains high weights in ‘Emotional-hurt-related’ emotion categories such as  
109 ‘compassion’, ‘emotional hurt’ and ‘sadness’. Interpretations of the other factors are shown in Fig. S2. We found  
110 that each dimension was related to a specific emotion category, and more than half of the factors corresponded to  
111 emotion dimensions addressed in the work of Cowen et al. (2017): ‘Awkwardness’, ‘Sexual desire’,  
112 ‘Entrancement’, ‘Amusement’, ‘Adoration (Friendliness)’, ‘Boredom’, ‘Anger’, ‘Admiration’, ‘Joy’, ‘Emotional  
113 hurt (Sadness)’, ‘Interest’, ‘Craving’ and ‘Nostalgia’. The other dimensions also allowed a similar interpretation as  
114 those in the work of Cowen et al. (2017), although the grouping was different: In our case, negative emotions such  
115 as ‘disgust’, ‘empathic pain’ and ‘fear’ were combined into one dimension, ‘Disgust’. Furthermore, ‘tension’,  
116 ‘nervousness’, ‘scare’ and ‘positive-fear’ were combined into one dimension, ‘Nervous scared’, while distinct  
117 dimensions were reported for the related emotions (‘Anxiety’, ‘Horror’ and ‘Fear’) in the work of Cowen et al.  
118 (2017). As for positive emotions, we found some ‘Excitement-related’ emotions (‘excitement’, ‘entrancement’,

119 ‘exuberance’, ‘encouragement’, and ‘fever’) that showed low contributions to explaining the BOLD responses (Fig.  
120 S3).

121           The semantic space was constructed from the aggregated regression model weights across all the  
122 subjects. To examine whether the obtained semantic space was consistent across individual subjects, we computed  
123 the Pearson’s correlation coefficient between the semantic space from one subject and that from the remaining  
124 seven subjects. As a control condition, we also computed the correlation coefficient between the semantic space  
125 from each excluded subject and that from the emotion ratings (see Methods). Table S1 lists the two types of  
126 correlation coefficients. For all of the subjects, we found a higher correlation between the individual and the group  
127 semantic space, than in the comparison with the emotion ratings. This suggests that the individual semantic space  
128 was consistent across the subjects and that the group semantic space can be used as a representative space for all  
129 the subjects.

130

131

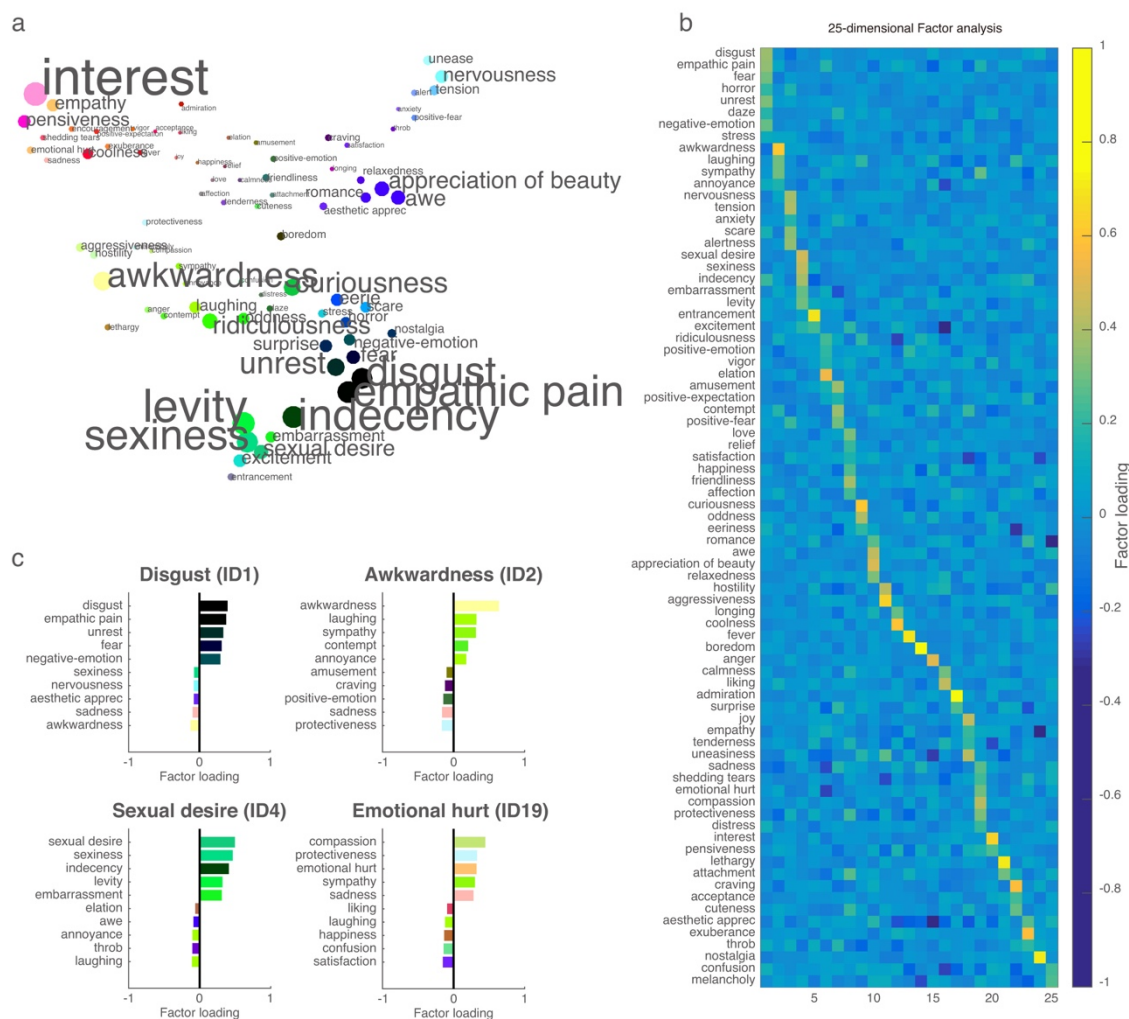

132

133 Figure 2. A semantic space of emotion and varimax factor loading. **a** Eighty emotion categories were plotted  
 134 according to distances between the estimated weights of the L2-regularised regression model, using *t*-distributed  
 135 stochastic neighbour embedding (*t*-SNE<sup>21</sup>). A single RGB colour was assigned to each emotion category according  
 136 to the three main components of the estimated weights (see Methods). Both marker size and font size were  
 137 modulated according to the average weight loading across voxels (larger size denotes higher average weights). **b** Factor  
 138 loadings of 25 components (= 25 emotion dimensions) of the estimated weights after varimax rotation. **c** Factor  
 139 loadings of four representative components: ‘Disgust’, ‘Awkwardness’, ‘Sexual desire’ and ‘Emotional hurt’. The  
 140 bars indicate the five highest and lowest factors.

141

142

### 143 Cortical gradient of 25 emotion dimensions

144 To examine how emotion dimensions were represented on the cortical surface, first, we assigned an RGB colour  
 145 according to the first to third principal components of the semantic space (see Methods). Two examples (subjects  
 146 S1 and S5) of the visualisation are shown in Fig. 3a. (The cortical maps for the other subjects are shown in Fig. S4.)  
 147 In both of the cortical maps, we found a weight gradient shown as a color gradient in the whole cortical surface.

148 For example, different colours were assigned to the postcentral area and the superior temporal area. Indeed, weight  
149 distributions of 80 emotion categories differed between the two representative voxels obtained from these two areas  
150 (Fig. 3b). Specifically, one voxel from the postcentral sulcus contained high weights in ‘Disgust’-related emotions  
151 such as ‘empathic pain’ and ‘unrest’. The other voxel in the superior temporal gyrus contained high weights in  
152 ‘Interest’ and ‘Awkwardness’-related emotions such as ‘interest’, ‘empathy’, ‘laughing’ and ‘awkwardness’. This  
153 suggests that weight variability across voxels was successfully visualised across the cortical map.

154 Then, we examined how weights of the emotion dimensions varied across the cortical surface, especially in  
155 the four areas that showed consistent colour gradients across subjects, namely, the postcentral area, the superior  
156 temporal area, the inferior parietal area and the precuneus (Fig. 4b). In each of these four areas, we obtained  
157 weights of the 25 emotion dimensions from 30 successive positions on eight manually defined lines (line 1–8). The  
158 cortical maps of two subjects (S1 and S5) in Fig. 4a show the lines. The obtained weights from each line were  
159 plotted in a sequential order of spatial coordinates in the flattened map (Fig. 4b, Fig. S5). The postcentral area  
160 showed high weights in negative emotions such as ‘Disgust’ and ‘Nervous scared’ across the successive positions.  
161 ‘Sexual desire’ also showed high weight, and high correlation in the weight gradient with ‘Disgust’ (line1:  $r =$   
162  $0.428$ , line2:  $r = 0.648$ ). The superior temporal area showed a high weight gradient from ‘Interest’ to  
163 ‘Awkwardness’ and ‘Aggressiveness’. ‘Aggressiveness’ showed similar weight gradients from ‘Nervous scared’  
164 (line3:  $r = 0.95$ , line4:  $r = 0.97$ ), ‘Sexual desire’ (line3:  $r = 0.77$ , line4:  $r = 0.88$ ) and ‘Curiousness’ (line3:  $r = 0.90$ ,  
165 line4:  $r = 0.95$ ). The inferior parietal area showed a high weight gradient from ‘Disgust’ to ‘Awe’ and ‘Interest’.  
166 ‘Disgust’ showed similar weight gradient from ‘Sexual desire’ (line5:  $r = 0.79$ , line6:  $r = 0.75$ ) and ‘Curiousness’  
167 (line5:  $r = 0.95$ , line6:  $r = 0.90$ ). ‘Interest’ showed similar weight gradients from ‘Emotional hurt’ (line5:  $r = 0.93$ ,  
168 line6:  $r = 0.77$ ) and ‘Coolness’ (line5:  $r = 0.95$ , line6:  $r = 0.89$ ). The precuneus showed a high weight gradient from  
169 ‘Interest’ and ‘Awkwardness’ to ‘Nervous scared’. ‘Interest’ showed a similar weight gradient to ‘Emotional hurt’  
170 (line7:  $r = 0.92$ , line8:  $r = 0.80$ ). Furthermore, ‘Sexual desire’ and ‘Disgust’ also showed high weights across the  
171 latter positions, and their gradients were highly correlated (line5:  $r = 0.94$ , line6:  $r = 0.96$ ). As supporting results,  
172 we showed that each line was obtained from anatomically similar regions, which is supported by the same or  
173 neighbour labels of the Destrieux atlas<sup>22</sup> obtained from each line across all the subjects (Fig. S6).







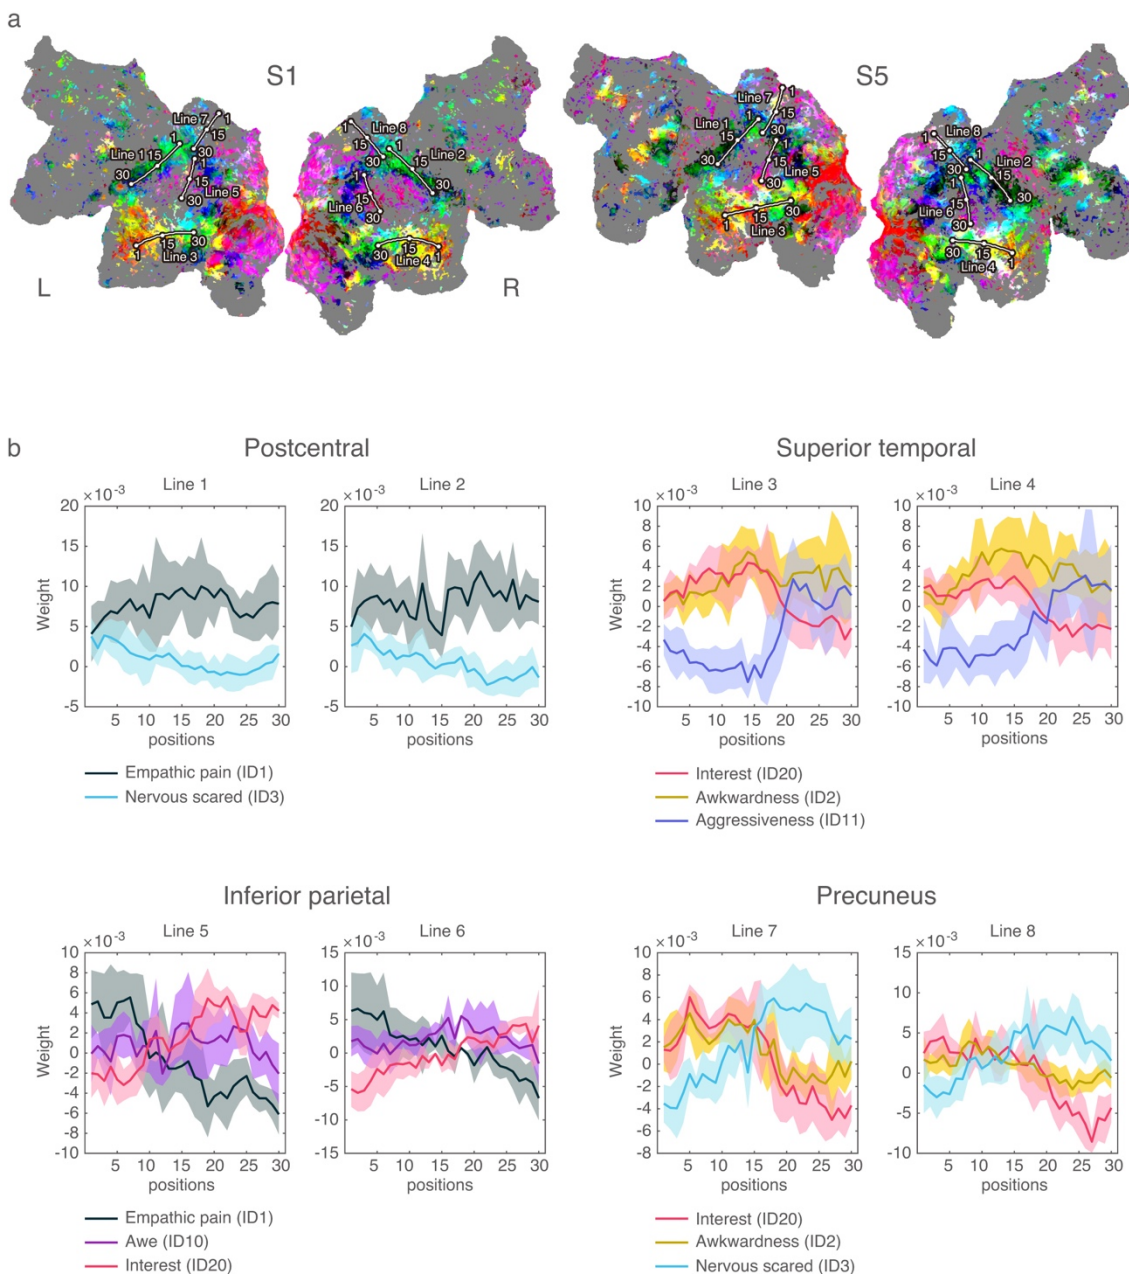

182

183

184

185

186

187

188

189

190

191

192

Figure 4. Weight gradient on the flattened cortical surface. **a** Positions of eight representative gradients are depicted as lines for two subjects (S1 and S5). Lines 1 and 2 were mainly located in the postcentral area, Lines 3 and 4 were mainly located in the superior temporal area, Lines 5 and 6 were mainly located in the inferior parietal area, and Lines 7 and 8 were mainly located in the precuneus. The anatomical location of each line was consistent across subjects, which is supported by results in Fig. S4. **b** Spatial transitions of representative (high absolute weights) emotion dimensions are plotted for each line. A bold plot denotes mean contribution across subjects. Shaded areas denote the standard deviation of contributions across subjects. The weights of all the emotion dimensions are shown in Fig. S5.

## 193 Discussion

194 To reveal how a rich variety of emotion categories are represented in the human brain, we estimated the BOLD  
195 responses to 80 emotion categories, and constructed a semantic space consisting of dimensions of response patterns  
196 to specific emotion categories. We found 25 semantic dimensions that exhibited statistically significant signals.  
197 This is a considerably richer variety of emotions than the number of emotion categories or affective dimensions  
198 used in previous brain imaging studies (i.e. a few to 15)<sup>1-8</sup>. Furthermore, each dimension showed a smooth gradient  
199 of the weights in the cortical surface. Such a gradient could not be revealed in these previous studies using a few  
200 emotion categories. By using a rich variety of emotions, we were able to construct a continuous space of emotion,  
201 and show more detailed localisation of the emotion categories.

202 The semantic space found here covered a large variety of emotion representations, and traditional  
203 emotion theories can be explained by part of the representations. In our semantic space, positive-emotion and  
204 negative-emotion categories were separately distributed (Fig. S1). This indicates that the positive/negative  
205 distinction is a basic factor for the organisation of emotions in the brain representation. This organisation is not  
206 contradictory to the emotion distribution in ‘Valence’ dimension of the core affect model<sup>14-17</sup>. Furthermore, we  
207 found that most of the dimensions in our semantic space consisted of semantically related emotion categories that  
208 allowed interpretation as a group (e.g. ‘tension’, ‘nervousness’ and ‘alertness’ to form the ‘Nervous scared’  
209 dimension). The total of 25 dimensions covered most of the emotion categories posited in the basic emotion  
210 theories<sup>9-13</sup>. Some dimensions for negative emotions such as ‘Disgust’ and ‘Nervous scared (Fear)’ had higher  
211 average weights than those for the other dimensions such as ‘Joy (Happiness)’ and ‘Anger’ (Fig. S3). It has been  
212 suggested that negative emotions are more informative in the brain representation than the other categories, which  
213 may be because of their importance for survival<sup>23, 24, 31</sup>.

214 Emotion representation in our semantic space was partly consistent with the representation revealed  
215 using behavioural data. Specifically, the emotion-category distribution in our semantic space was consistent with  
216 the manually defined hierarchy of WordNet-Affect<sup>20</sup> (Fig. S1) in that the positive, negative and ambiguous  
217 emotions were distinguished from each other<sup>25</sup>. This distinct positive/negative representation was also observed in  
218 a recent study using large-scale psychological assessments<sup>19</sup>. Quantitatively, regarding the number of emotion  
219 dimensions, the 25 dimensions found here were similar to the 27 dimensions reported in the work of Cowen et al.  
220 (2017). Qualitatively, most of the 25 dimensions showed similar meanings to the behaviourally-defined emotion  
221 dimensions (e.g. ‘Awkwardness’, ‘Sexual desire’, and ‘Entrancement’). However, we found some differences  
222 regarding the boundaries among negative emotions (‘Empathic pain’, ‘Disgust’, and ‘Fear’). In our case, these  
223 negative emotions were combined into a single dimension while they were maintained as separate dimensions in  
224 the work of Cowen et al. (2017).

225 Regarding the emotion dimensions of the semantic space, we found the smooth gradients of the weights in the  
226 following areas: the superior temporal area, the inferior parietal area, the precuneus, and the postcentral area. A  
227 previous study reported a unimodal to transmodal gradient of functional connectivity in the former three areas,

228 suggesting a cortical gradient of representation from sensory information to more abstract function<sup>26</sup>. A similar  
229 gradient was observed during speech recognition tasks, as represented by the gradient from visual/tactile (sensory)  
230 information to emotional/social (abstract) information<sup>27</sup>. In these areas, such gradients spatially correspond to our  
231 weight gradient from relatively strong emotions (e.g. ‘Sexual desire’, ‘Disgust’ and ‘Nervous scared’) to more  
232 complex emotions (e.g. ‘Awkwardness’, ‘Emotional hurt’ and ‘Interest’). This suggests that such strong emotions  
233 might be related to sensory or physical information, while more complex emotions might be related to more  
234 abstract (higher-order cognitive) information. Furthermore, in the postcentral area, we found a smooth gradient of  
235 ‘Nervous scared’ and ‘Disgust’ (including empathic pain). In this area, such localisation of these negative emotions  
236 was also reported in previous fMRI studies<sup>28,29</sup>. However, the cortical gradient of the representation has not been  
237 revealed. This area is well known to have selectivity to somatosensory information, where regions responding to  
238 upper body parts are located more ventrally<sup>30</sup>. The localisation of the negative emotions may be caused by bodily  
239 reactions to the experience of high-arousal emotions, such as goose pimples<sup>31</sup>, and the weight gradient may be  
240 caused by differences in the bodily parts exhibiting responses among these emotions.

241 In the current study, we demonstrated localisation of emotion categories in the whole cortex, but not in the  
242 sub-cortex. Previous brain-imaging studies traditionally focused on localisation of basic emotions into the sub-  
243 cortical areas<sup>32-36</sup> and the connected cortical areas such as insular and cingulate<sup>37-39</sup>. In particular, the amygdala is  
244 well known to be sensitive to ‘fear’<sup>40,33</sup>. Although our study showed emotion representation in these connected  
245 areas, we could not provide strong support for the relationships to the sub-cortical areas. For example, when we  
246 examined voxels showing high prediction accuracy of the emotion-category model, in fact such voxels were found  
247 in the amygdala, (no. of significant voxels/no. of voxels, S1:5/334; S2: 69/427; S3:11/392; S4:61/427; S5:30/398;  
248 S6:8/349; S7: 8/400; S8:5/361, uncorrected  $p < 0.0001$ , Pearson's correlation test). However, the effect size was  
249 smaller than that in most cortical areas. Therefore, we here focused on the cortex.

250 Our weak support for association of emotion with the amygdala might have been caused by the experimental  
251 settings. In most previous studies<sup>41,42,35,36</sup>, brain activities were measured when evoking a specific emotion  
252 (especially ‘fear’) and also under neutral conditions, and the relationships of emotion to the amygdala were  
253 examined as a difference of activation between the two conditions. In comparison, we measured brain activities  
254 when feeling certain kinds of emotion evoked by movie scenes, and the responses to each emotion were estimated  
255 without comparison to the neutral condition. Furthermore, the amygdala activity might have been influenced by a  
256 task modality, where the difference in activation between the two conditions was lower in a movie-viewing task  
257 than in a still-image-viewing task<sup>36</sup>. Therefore, we could not provide strong evidence for the relationship of  
258 emotions with the amygdala.

259 One important issues in this context is about the relationship between emotions and objective information. In  
260 this study, we subtracted the effect of sensory information when estimating emotion-category weights (see  
261 Methods). However, it is natural to assume that emotion is positively correlated with objective information such as  
262 visual and auditory features (e.g. ‘a baby induces feelings of adoration’, ‘a music in a minor key induces feelings of

263 sadness'). Actually, intense competitions to predict emotions from objective information (e.g. visual, auditory, and  
264 linguistic features) are lively held in the engineering field, and the state-of-the-art methods show good prediction  
265 performance<sup>43-46</sup>. To obtain a comprehensive understanding of emotion, future study is necessary to perform close  
266 comparisons of objective information, emotions, and the related brain activity.

267           Taken the obtained findings together, we found that a rich variety of emotion categories are represented  
268 in the human brain. In this study, we visualised the representation as a semantic space consisting of 25 emotion  
269 dimensions, each of which can be interpreted as similar emotion categories. In addition, we found smooth gradients  
270 of the emotion representation on the cortical surface, especially from unimodal to transmodal regions.

271

## 272 **Methods**

273

274 **Subjects.** Eight healthy individuals (S1–S8; age 23–32; four females) with normal or corrected-to-normal vision  
275 participated in our experiments. Before the experiments, we explained to the subjects that stimuli to be used would  
276 include extreme content, such as violent, disgusting or erotic representations. All the subjects accepted this and  
277 provided written informed consent. The ethics and safety committees of the National Institute of Information and  
278 Communications Technology approved the experimental protocol.

279

280 **Experimental design.** In our experiments, fMRI BOLD responses were recorded while subjects watched audio-  
281 visual stimuli. The stimuli consisted of 138 movie clips from a video-sharing site *vimeo* (<https://vimeo.com/jp>),  
282 which were selected to induce a rich variety of emotions. Examples of the movie genres were as follows: horror,  
283 violent drama, comedy, romance, fantasy, daily life scenes, and action movies. Movie clips were cut down to 10–  
284 20 s in length (mean of 15 s), and recreated as a sequence of stimuli by combining the selected clips in a random  
285 order.

286 The visual stimuli were presented at the centre of a projector screen with  $23.3 \times 13.2$  degrees of  
287 visual angle at 30 Hz. The audio stimuli were presented through MR-compatible earphones with an appropriate  
288 volume level for each subject. The subjects were instructed to watch the clips naturally as if watching TV show in  
289 daily life. For each subject, fMRI data were collected in 3 separate sessions over 3 or 4 days. Each session  
290 consisted of six movie-watching runs (each run lasting 610 s). A total of 18 runs were divided into 12 model  
291 training runs and 6 model testing runs. The model training runs were used to train encoding models and consisted  
292 of 480 different movie clips shown once each (total 7,200 s). The model testing runs were used to assess model  
293 prediction accuracy and consisted of three different types of 300-s movie sequence shown four times each (total  
294 3,600 s). None of the movies in the training runs was shown in the test runs.

295

296 **fMRI data acquisition.** fMRI data were acquired using a 3T Siemens Trio TIM scanner (Siemens, Germany)  
297 with a standard Siemens 32-channel volume coil and a multiband gradient echo-planar imaging sequence<sup>47</sup>  
298 [TR = 2,000 ms, TE = 30 ms, flip angle =  $62^\circ$ ; voxel size =  $2 \times 2 \times 2$  mm<sup>3</sup>, matrix size =  $96 \times 96$ , 72 axial slices,  
299 FOV =  $192 \times 192$  mm<sup>2</sup>, multiband factor = 3]. Anatomical data were collected on the same 3T scanner using T1-  
300 weighted MPRAGE [TR = 2530 ms, TE = 3.26 ms, flip angle =  $9^\circ$ , voxel size =  $1 \times 1 \times 1$  mm<sup>3</sup>, matrix  
301 size =  $256 \times 256$ , 256 axial slices, FOV =  $256 \times 256$  mm<sup>2</sup>].

302

303 **fMRI data preprocessing.** The Statistical Parameter Mapping toolbox (SPM8,  
304 <http://www.fil.ion.ucl.ac.uk/spm/software/spm8/>) was used to preprocess EPI data. We performed motion  
305 correction by aligning all of the EPI data to the first image from the first scan for each subject. For each voxel,  
306 responses were normalised by subtracting the mean response across all time points. Then, long-term trends were

307 removed by subtracting results of the median filter convolution (120-s time window). To define anatomical regions,  
308 for each subject, the cerebral cortex was segmented into 156 regions of the Destrieux atlas<sup>22</sup> by using FreeSurfer  
309<sup>48</sup>. The segmentation results in T1 space were registered to the EPI space using Freesurfer functions, and each voxel  
310 was given one anatomical label.

311

312 **Emotion ratings and preprocessing.** We collected ratings regarding each of the 80 emotion categories (see  
313 **‘80 emotion categories’** in Methods) induced upon exposure to the movie stimuli used in our fMRI  
314 experiments. To obtain the emotion ratings, we recruited 174 annotators. They were instructed to rate how well an  
315 emotion category (e.g. ‘laughing’) matched to the movie scene, by assigning a value ranging from 0 (not match at  
316 all) to 100 (matched perfectly). These annotators were also instructed to make ratings based not on ‘movie  
317 character’s feeling’, but on ‘their own feeling’. The ratings were made by dragging a mouse while watching the  
318 movie stimuli. The ratings were stored at 1-s resolution. To obtain reliable data, first, we conducted an aptitude test  
319 for each annotator. Specifically, we used a 246-s test movie, and examined consistency of temporal fluctuation of  
320 ratings between a template by one of the authors (NK) and each annotator, regarding each of two emotions: ‘fear’  
321 and ‘disgust’. From the results, for all the 174 annotators, the ratings showed significantly high correlations with  
322 the template ratings in both emotions ( $p < 0.05$  for 246 time samples).

323 For each emotion category, each of four different annotators rated all of the movie stimuli. At most, two  
324 emotions were rated by one annotator, and we prevented them from rating similar emotions in successive rating  
325 periods. (In each period, a annotator rated for the whole movie stimuli.) The ratings for each annotator and each  
326 emotion were de-noised by convolving a median filter (5 s time window), and de-trended by subtracting results of  
327 convolving another median filter (150 s time window). For each emotion category, the preprocessed ratings were  
328 averaged across those for the four annotators at 2-s resolution (i.e. BOLD sampling rate). Finally, we obtained  
329 preprocessed 80-emotion ratings of 3,600 samples used as training data, and 80-emotion ratings of 1,800 samples  
330 used as test data.

331

332 **Model fitting.** To estimate the BOLD-response patterns to 80 emotion categories, we constructed a voxel-wise  
333 linear regression model to explain BOLD responses<sup>51,52</sup>. The stimulus vector (total 2,080 dimensions) included  
334 emotion ratings and sensory factors (visual and auditory features). The latter was included to remove spurious  
335 correlation with the sensory factors (see **Removing spurious correlation between emotion ratings and**  
336 **sensory information**). To capture the hemodynamic response, the stimulus vector was concatenated with three  
337 temporal delays of 2, 4 and 6 s (total 6,240 dimensions). The model weights were optimised by least squares with  
338 L2-regularisation. The regularisation coefficient ( $\gamma$ ) was optimised in 10-fold cross validation using 10 unique  
339 training-validation (9:1) subsets by randomised sampling from the training data (3,600 samples). In each cross-  
340 validation step, we then constructed the regression model using a training subset, and computed prediction  
341 accuracy using a validation subset for each  $\gamma$  of  $2^i$ , where  $i = \{0, 2, \dots, 25\}$ . The prediction accuracy was



342 quantified as an across-voxel average of the correlation coefficients between the actual and predicted training  
343 BOLD responses. We employed the best  $\gamma$  showing the highest accuracy across 10 repetitions. We constructed the  
344 regression model with the best  $\gamma$  using the training data (3,600 samples), and computed the prediction accuracy  
345 using the test data (1,800 samples). In our main analyses, we used voxels with high prediction accuracy of the  
346 emotion-related BOLD responses, after regressing out the sensory factors. To determine the emotion dimensions  
347 using CCA, we employed voxels with high prediction accuracies (uncorrected  $p < 0.0001$ ) averaged across the 10  
348 folds (3,984–13,068 cortical voxels per subject). To construct the semantic space of emotion, we employed voxels  
349 with high prediction accuracy (uncorrected  $p < 0.0001$ ) for the test data (18,684–34,066 cortical voxels per  
350 subject).

351

352 **Removing spurious correlation between emotion ratings and sensory information.** To estimate  
353 unalloyed responses to emotion categories, spurious correlation with a sensory factor was explained away from  
354 model prediction for the BOLD responses to 80 emotion categories<sup>52</sup>. For this purpose, we employed low-level  
355 visual and auditory features as the sensory factor, and used them to fit the linear regression model, but these were  
356 not used in the model prediction.

357 As low-level visual features, we employed output of 2,139 motion energy filters<sup>51</sup>. Each filter  
358 consists of quadrature pairs of spatiotemporal Gabor filters. Input frames were obtained at 15 Hz, and resized from  
359  $720 \times 1280 \times 3$  to  $96 \times 171 \times 3$ , followed by cropping in the centre to a size of  $96 \times 96$ . Then, the image was  
360 converted from RGB colour to (CIE)  $L^*A^*B^*$  colour space, and the colour information was discarded. The motion  
361 energy signals were yielded from the filter output, and then log-transformed and averaged across 2 s (TR).  
362 Consequently, we obtained 2,139 visual features, which represent preferences to spatial frequencies, temporal  
363 frequencies, and orientations. To minimise the computational burden, we reduced the original dimensions to 1,000  
364 using singular value decomposition. These 1,000 components preserved 83.8% of the variance explained in the  
365 original features.

366 As the low-level auditory features, we employed output of the modulation-transfer function model  
367<sup>53</sup>. The spectrogram was generated using 128 bandpass filters<sup>54</sup> with window size of 25 ms and hop size of 10 ms.  
368 Then, the spectrogram was convolved with quadrature pairs of modulation-selective filters for 10 spectral  
369 modulation scales and 10 temporal modulation rates. The modulation energy was calculated using the same  
370 methods as reported by Nishimoto et al. (2011)<sup>51</sup>. Modulation energy was log-transformed, averaged across 2 s  
371 (TR), and further averaged within each of the 20 nonoverlapping frequency ranges logarithmically spaced in the  
372 frequency axis. From the results, we obtained 2,000 auditory features, which represent preferences to frequencies  
373 of audio signal, and the temporal variation of the preference frequencies. The same as in the visual feature  
374 extraction, we reduced the original dimensions to 1,000 to minimise the computational burden. The 1,000  
375 components preserved 93.4% of the variance explained in the original features.

376 As supplementary results, we showed the prediction accuracies of the BOLD responses using each  
377 type of the three features: emotion, visual and auditory (Fig. S7). The accuracy was quantified using Pearson's  
378 correlation coefficients between the actual and predicted responses. We confirmed high prediction accuracy for the  
379 early visual and early auditory cortex from the visual and auditory features, respectively. This indicates that these  
380 two features could plausibly explain BOLD response in the early visual and auditory cortices.

381

382 **Emotion dimensions based on the BOLD-response patterns.** To estimate significant emotion  
383 dimensions, CCA was performed based on correlation in temporal fluctuation between each emotion rating and  
384 BOLD responses. In the CCA, the two types of factor loadings ( $\mathbf{A}$ ,  $\mathbf{B}$ ) were estimated to have the maximum  
385 correlation between the linear combinations of emotion ratings and the BOLD responses. Using the training data,  
386 we estimated the factor loadings ( $\mathbf{A}^*$ ,  $\mathbf{B}^*$ ) as follows:

$$387 \mathbf{A}^*, \mathbf{B}^* = \underset{\mathbf{A}, \mathbf{B}}{\operatorname{argmax}} \operatorname{corr}(\mathbf{S} \cdot \mathbf{A}, \widehat{\mathbf{R}} \cdot \mathbf{B}),$$

388 where  $\operatorname{corr}(\mathbf{i}, \mathbf{j})$  denotes correlation coefficients between  $\mathbf{i}$  and  $\mathbf{j}$ .  $\mathbf{S}$  ( $3,600 \times 80$ ) is the emotion ratings.  $\widehat{\mathbf{R}}$   
389 ( $3,600 \times 1,800$ ) is the dimension-reduced BOLD responses of voxels showing good prediction accuracy  
390 (correlation coefficients,  $p < 0.0001$ ) in 10-fold cross-validation in the linear regression model (see 'A linear  
391 regression model for 80 emotion categories' in Methods). To validate the estimated  $\mathbf{A}^*$  and  $\mathbf{B}^*$ , we used test  
392 data of  $\widehat{\mathbf{R}}$  ( $1,800 \times 1,800$ ) and  $\mathbf{S}$  ( $1,800 \times 80$ ). Then, we quantified the significance of each dimension of  $\mathbf{A}$  as a  
393 Pearson's correlation coefficient between each dimension of  $\mathbf{S} \cdot \mathbf{A}$  and that of  $\widehat{\mathbf{R}} \cdot \mathbf{B}$ . The significance was defined  
394 by the statistical significance ( $p < 0.01$ ; with Bonferroni correction for 80 emotion categories). After obtaining  
395 significant dimensions of  $\mathbf{A}^*$  ( $\mathbf{A}_{sig}$ ), we conducted a varimax factor rotation<sup>19</sup> on  $\mathbf{A}_{sig}$  to explain dimensions  
396 with fewer emotion categories. The  $\mathbf{A}_{sig}$  provided interpretation of a specific BOLD-response pattern by using the  
397 correlated emotion categories. Then, we calculated the median of the numbers of the significant dimensions across  
398 subjects (25 dimensions, Fig. S1). The number (25) was used in the subsequent analysis to determine the number of  
399 dimensions for a semantic space of emotion.

400

401 **A semantic space for brain representation of 80 emotion categories.** To construct a semantic space,  
402 we used emotion-category weights of the regression model using voxels with high prediction accuracies ( $p <$   
403  $0.0001$ , uncorrected; the number of significant voxels ranged from 18,684 to 34,066 cortical voxels for each  
404 subject). The emotion-category weights were averaged across three temporal delays, and we obtained weight  
405 matrices (18,684–34,066 cortical voxels  $\times$  80 emotions) that represent voxel-wise selectivity to each of the  
406 emotion categories. The weights for each subject were concatenated across eight subjects. We called them 'group  
407 weights'. PCA was used to reduce the dimensions of the group weights to the number of significant dimensions of  
408 the CCA results (25 dimensions). We defined the PCA space as the semantic space of emotion. Then, we  
409 conducted a varimax factor rotation on the principal components, to obtain interpretation of each emotion

410 dimension. Factors with high negative loadings were rotated to have the opposite direction by multiplying by -1.  
411 The rotated components were used as '25 emotion dimensions' in analyses for the cortical gradient of emotion  
412 representation.

413 To confirm across-subject consistency of a semantic space, we performed a leave-one-subject-out  
414 method. For this, we constructed a semantic space for a single subject (individual space), and also that for the  
415 weights concatenated across the remaining seven subjects (sub-group space). As a control semantic space, we also  
416 constructed a semantic space by performing PCA (category-dimension reduction) on the emotion ratings of the  
417 training data. All of the three types of semantic space consist of the number of significant dimensions in the CCA  
418 analysis for the left-out subject (19–32 dimensions per subject). To support across-subject consistency of individual  
419 spaces, we showed that the similarity to the sub-group space ( $r_g$ ) was higher than that to the control space ( $r_c$ ) for  
420 each subject. To quantify the similarity between semantic spaces, we calculated a Pearson's correlation coefficient  
421 in emotion distributions between each semantic space pair. The emotion distribution was quantified as pair-wise  
422 distances (correlation distance) of emotion categories in each semantic space.

423

424 **Cortical gradients of emotion dimensions.** To visualise how emotion-category weights were distributed  
425 through the cortical surface, we used the first three components of the semantic space. Emotion-category weights of  
426 each voxel were first projected to the semantic space consisting of the three components. Then, the projected  
427 coordinates were normalised to range from 0 to 1 by z-scoring and linear scaling. The output result was used as  
428 RGB colour projected to voxel coordinates in the flattened cortical map. We can observe the weight gradient of  
429 emotion categories as the RGB colour gradient on the cortical map. Furthermore, we assigned an RGB colour to  
430 each emotion category by using three normalised components for each emotion category. This colour was used for  
431 visualisation of the semantic space in Fig. 2a. Each of the emotion-category colours implies an association with  
432 regions which have a similar colour in the flattened cortical map.

433 In the cortical map for emotion-category weights, we observed a smooth gradient in four areas: the  
434 postcentral area, the superior temporal area, the inferior parietal area, and the precuneus. To quantify the weight  
435 gradient, for each voxel, we first computed the weight of the 25 emotion dimensions by multiplying the 80  
436 dimensional weights [ $1 \times 80$ ] and the 25 emotion dimensions [ $80 \times 25$ ]. Then, we manually defined eight lines on a  
437 smooth gradient in the four areas at each of the left and the right hemispheres (see Fig. 4a), with reference to the  
438 flattened cortical map using the in-house Matlab (MathWorks Inc.) GUI toolbox. To confirm that each line is  
439 located at similar anatomical location, we obtained the anatomical label of the Destrieux atlas<sup>22</sup> from each line for  
440 each subject (Fig. S4). The label was defined based on anatomical location using Freesurfer<sup>48</sup>.

441

#### 442 **Eighty emotion categories**

443 The 80 emotion categories are listed below:

444 (1)love, (2)amusement, (3)craving, (4)joy, (5)nostalgia, (6)boredom, (7)calmness, (8)relief, (9)romance,

445 (10)sadness, (11)admiration, (12)aesthetic appreciation, (13)awe, (14)confusion, (15)entrancement, (16)interest,  
446 (17)satisfaction, (18)excitement, (19)sexual desire, (20)surprise, (21)nervousness, (22)tension, (23)anger,  
447 (24)anxiety, (25)awkwardness, (26)disgust, (27)empathic pain, (28)fear, (29)horror (bloodcurdling), (30)laughing,  
448 (31)happiness, (32)friendliness, (33)ridiculousness, (34)affection, (35)liking, (36)shedding tears, (37)emotional  
449 hurt, (38)sympathy, (39)lethargy, (40)empathy, (41)compassion, (42)curiousness, (43)unrest, (44)exuberance,  
450 (45)appreciation of beauty, (46)fever, (47)scare (feel a chill), (48)daze, (49)positive-expectation, (50)throb,  
451 (51)sexiness, (52)indecenty, (53)embarrassment, (54)oddness, (55)contempt, (56)alertness, (57)eeriness,  
452 (58)positive-emotion, (59)vigor, (60)longing, (61)tenderness, (62)pensiveness, (63)melancholy, (64)relaxedness,  
453 (65)acceptance, (66)unease, (67)negative-emotion, (68)hostility, (69)levity, (70)protectiveness, (71)elation,  
454 (72)coolness, (73)cuteness, (74)attachment, (75)encouragement, (76)annoyance, (77)positive-fear,  
455 (78)aggressiveness, (79)distress, (80)stress

456

#### 457 **Acknowledgements**

458 This study was partly funded by Brother Industries Ltd. and JSPS KAKENHI Grant Numbers 15H05311,  
459 15H05710 and JP18H05091 in #4903 (Evolinguistics). Data were collected with support from the National  
460 Institute of Information and Communications Technology.

461

#### 462 **Author contributions**

463 N.K. and S.N. designed the experiment; N.K collected the data; N.K analysed the data with support from T.N.  
464 and S.N. and all authors wrote the manuscript.

465

#### 466 **Conflict of interest**

467 The authors declare that the research was conducted in the absence of any commercial or financial relationships  
468 that could be construed as a potential conflict of interest.

469

#### 470 **Data availability**

471 The data that support the findings of this study are available from the corresponding author upon request.

472

#### 473 **References**

- 474 1. Winston, J. S. Integrated neural representations of odor intensity and affective valence in human amygdala.  
475 *Journal of Neuroscience*, 25 (39), 8903–8907 (2005).
- 476 2. Tettamanti, M., Rognoni, E., Cafiero, R., Costa, T., Galati, D., & Perani, D. Distinct pathways of neural  
477 coupling for different basic emotions. *NeuroImage*, 59(2), 1804–1817 (2012).

- 478 3. Chikazoe, J., Lee, D. H., Kriegeskorte, N., & Anderson, A. K. Population coding of affect across stimuli,  
479 modalities and individuals, *Nature Neuroscience*, 17 (8), 1114–1122 (2014).
- 480 4. Kragel, P. a., & LaBar, K. S. Advancing emotion theory with multivariate pattern classification. *Emotion*  
481 *Review*, 6 (2), 160–174 (2014).
- 482 5. Wager, T. D., Kang, J., Johnson, T. D., Nichols, T. E., Satpute, A. B., & Barrett, L. F. A Bayesian model of  
483 category-specific emotional brain responses. *PLoS Computational Biology*, 11 (4), e1004066 (2015).
- 484 6. Saarimäki, H., Gotsopoulos, A., Jääskeläinen, I. P., Lampinen, J., Vuilleumier, P., Hari, R., ... Nummenmaa,  
485 L. Discrete neural signatures of basic emotions. *Cerebral Cortex*, 26 (6), 2563–2573 (2015).
- 486 7. Saarimaki, H., Ejtehadian, L. F., Glerean, E., Jaaskelainen, I. P., Vuilleumier, P., Sams, M., & Nummenmaa,  
487 L. Distributed affective space represents multiple emotion categories across the brain. Preprint at  
488 <https://www.biorxiv.org/content/early/2017/04/05/123521> (2017).
- 489 8. Kragel, P. A., & LaBar, K. S. Decoding the nature of emotion in the brain. *Trends in Cognitive Sciences*, 20  
490 (6), 444–455 (2016).
- 491 9. Johnson-Laird, P. N., & Oatley, K. The language of emotions: An analysis of a semantic field. *Cognition and*  
492 *Emotion*, 3 (2), 81–123 (1989).
- 493 10. Mauss, I. B., McCarter, L., Levenson, R. W., Wilhelm, F. H., & Gross, J. J. The tie that binds? Coherence  
494 among emotion experience, behavior, and physiology. *Emotion*, 5 (2), 175–190 (2005).
- 495 11. Rottenberg, J., Ray, R. D., & Gross, J. J. *Handbook of Emotion Elicitation and Assessment* “*Emotion*  
496 *Elicitation Using Films*”, (Oxford university press, Oxford, 2007).
- 497 12. Lench, H. C., Flores, S. A., & Bench, S. W. Discrete emotions predict changes in cognition, judgment,  
498 experience, behavior, and physiology: A meta-analysis of experimental emotion elicitation. *Psychological*  
499 *Bulletin*, 137 (5), 834–855 (2011).
- 500 13. Ekman, P. What scientists who study emotion agree about. *Perspectives on Psychological Science*, 11 (1),  
501 31–34 (2016).
- 502 14. Russell, J. A., & Barrett, L. F. Core affect, prototypical emotional episodes, and other things called emotion :  
503 Dissecting the elephant, *Journal of Personality and Social Psychology*, 76 (5), 805-819 (1999).
- 504 15. Barrett, L. F. Solving the emotion paradox : Categorization and the experience of emotion, *Personality and*  
505 *Social Psychology Review*, 10 (1), 20-46 (2006).
- 506 16. Russell, J. A. Emotion, core affect, and psychological construction. *Cognition and Emotion*, 23 (7), 1259–  
507 1283 (2009).
- 508 17. Barrett, L. F., & Bliss-moreau, E. Affect as a psychological primitive, *Advances in Experimental Social*  
509 *Psychology*, 41, 167-218 (2009).
- 510 18. Lerner, J. S., & Keltner, D. Beyond valence: Toward a model of emotion specific influences on judgment and  
511 choice. *Cognition and Emotion*, 14 (4), 473–493 (2000).

- 512 19. Cowen, A. S., & Keltner, D. Self-report captures 27 distinct categories of emotion bridged by continuous  
513 gradients. *Proceedings of the National Academy of Sciences*, 114 (38), E7900-E7909 (2017).
- 514 20. Strapparava, C., & Valitutti, A. Wordnet affect: an affective extension of wordnet. In *Lrec*, 4, 1083-1086  
515 (2004).
- 516 21. Maaten, L. V. D., & Hinton, G. Visualizing data using t-SNE. *Journal of Machine Learning Research*, 9  
517 (Nov), 2579-2605 (2008).
- 518 22. Destrieux, C., Fischl, B., Dale, A., & Halgren, E. Automatic parcellation of human cortical gyri and sulci using  
519 standard anatomical nomenclature. *NeuroImage*, 53 (1), 1-15 (2010).
- 520 23. Randler, C., Desch, I. H., im Kampe, V. O., Wüst-Ackermann, P., Wilde, M., & Prokop, P. Anxiety, disgust  
521 and negative emotions influence food intake in humans. *International Journal of Gastronomy and Food*  
522 *Science*, 7, 11-15 (2017).
- 523 24. Critchley, H. D., Wiens, S., Rotshtein, P., Öhman, A., & Dolan, R. J. Neural systems supporting interoceptive  
524 awareness, *Nature Neuroscience*, 7 (2), 189–195 (2004).
- 525 25. Toivonen, R., Kivelä, M., Saramäki, J., Viinikainen, M., Vanhatalo, M., & Sams, M. Networks of emotion  
526 concepts. *PloS One*, 7 (1), e28883 (2012).
- 527 26. Margulies, D. S., Ghosh, S. S., Goulas, A., Falkiewicz, M., & Huntenburg, J. M. Situating the default-mode  
528 network along a principal gradient of macroscale cortical organization, *Proceedings of the National Academy of*  
529 *Sciences*, 113 (44), 12574–12579 (2016).
- 530 27. Huth, A. G., de Heer, W. A., Griffiths, T. L., Theunissen, F. E., & Gallant, J. L. Natural speech reveals the  
531 semantic maps that tile human cerebral cortex, *Nature*, 532 (7600), 453- 458 (2016).
- 532 28. Zhao, K., Zhao, J., Zhang, M., Cui, Q., & Fu, X. Neural responses to rapid facial expressions of fear and surprise,  
533 *Frontiers in Psychology*, 8 (761), 1-8 (2017).
- 534 29. Benussi, F., Lui, F., Duzzi, D., Nichelli, P. F., & Porro, C. A. Does it look painful or disgusting? Ask your  
535 parietal and cingulate cortex. *Journal of Neuroscience*, 28 (4), 923-931 (2008).
- 536 30. Saadon-grosman, N., Tal, Z., Itshayek, E., Amedi, A., & Arzy, S. Discontinuity of cortical gradients reflects  
537 sensory impairment, *Proceedings of the National Academy of Sciences*, 112 (52), 16024–16029 (2015).
- 538 31. Grewe, O., Kopiez, R., & Altenmüller, E. The chill parameter: Goose bumps and shivers as promising  
539 measures in emotion research, *Music Perception: An Interdisciplinary Journal*, 27 (1), 61-74 (2009).
- 540 32. Davis, M., & Whalen, P. J. The amygdala: Vigilance and emotion. *Molecular Psychiatry*, 6 (1), 13–34 (2001).
- 541 33. Phan, K. L., Wager, T., Taylor, S. F., & Liberzon, I. Functional neuroanatomy of emotion: A meta-analysis of  
542 emotion activation studies in PET and fMRI. *NeuroImage*, 16 (2), 331–348 (2002).
- 543 34. Holland, P. C., & Gallagher, M. Amygdala-frontal interactions and reward expectancy. *Current Opinion in*  
544 *Neurobiology*, 14 (2), 148–155 (2004).
- 545 35. Schienle, A., Schäfer, A., Stark, R., Walter, B., & Vaitl, D. Relationship between disgust sensitivity, trait anxiety  
546 and brain activity during disgust induction. *Neuropsychobiology*, 51 (2), 86–92 (2005).



- 547 36. Costafreda, S. G., Brammer, M. J., David, A. S., & Fu, C. H. Y. Predictors of amygdala activation during the  
548 processing of emotional stimuli: A meta-analysis of 385 PET and fMRI studies. *Brain Research Reviews*, 58  
549 (1), 57–70 (2008).
- 550 37. Augustine, J. R. Circuitry and functional aspects of the insular lobe in primates including humans, *Brain*  
551 *Research Reviews*, 22 (3), 229–244 (1996).
- 552 38. Damasio, A. R., Grabowski, T. J., Bechara, A., Damasio, H., Ponto, L. L. B., Parvizi, J., & Hichwa, R. D.  
553 Subcortical and cortical brain activity during the feeling of self-generated emotions, *Nature Neuroscience*, 3  
554 (10), 1049–1056 (2000).
- 555 39. Pezawas, L., Meyer-Lindenberg, A., Drabant, E. M., Verchinski, B. A., Munoz, K. E., Kolachana, B. S., ... &  
556 Weinberger, D. R. 5-HTTLPR polymorphism impacts human cingulate-amygdala interactions: a genetic  
557 susceptibility mechanism for depression. *Nature Neuroscience*, 8 (6), 828-834 (2005).
- 558 40. Davis, M., & Whalen, P. J. The amygdala: Vigilance and emotion. *Molecular Psychiatry*, 6 (1), 13–34 (2001).
- 559 41. Sheline, Y. I., Barch, D. M., Donnelly, J. M., Ollinger, J. M., Snyder, A. Z., & Mintun, M. A. Increased  
560 amygdala response to masked emotional faces in depressed subjects resolves with antidepressant treatment:  
561 an fMRI study. *Biological Psychiatry*, 50 (9), 651-658 (2001).
- 562 42. Tabert, M. H., Borod, J. C., Tang, C. Y., Lange, G., Wei, T. C., Johnson, R., ... & Buchsbaum, M. S.  
563 Differential amygdala activation during emotional decision and recognition memory tasks using unpleasant  
564 words: an fMRI study. *Neuropsychologia*, 39 (6), 556-573 (2001).
- 565 43. Tang, D., Qin, B., Liu, T., & Li, Z. Learning sentence representation for emotion classification on microblogs.  
566 *In Natural Language Processing and Chinese Computing, Springer, Berlin, Heidelberg*, 212-223 (2013).
- 567 44. Ellis, J. G., Lin, W. S., Lin, C. Y., & Chang, S. F. Predicting evoked emotions in video. *In Multimedia (ISM),*  
568 *2014 IEEE International Symposium*, 287-294 (2014).
- 569 45. Pang, L., Zhu, S., & Ngo, C. W. Deep multimodal learning for affective analysis and retrieval. *IEEE*  
570 *Transactions on Multimedia*, 17 (11), 2008-2020 (2015).
- 571 46. Baveye, Y., Dellandrea, E., Chamaret, C., & Chen, L. Deep learning vs. kernel methods: Performance for  
572 emotion prediction in videos. *In Affective Computing and Intelligent Interaction (ACII), 2015 International*  
573 *Conference, IEEE*, 77-83 (2015).
- 574 47. Moeller, S., Yacoub, E., Olman, C. A., Auerbach, E., Strupp, J., Harel, N., & Ugurbil, K. Multiband  
575 multislice GE-EPI at 7 tesla, with 16-fold acceleration using partial parallel imaging with application to high  
576 spatial and temporal whole-brain fMRI. *Magnetic Resonance in Medicine*, 63 (5), 1144-1153 (2010).
- 577 48. Dale, A. M., Fischl, B., & Sereno, M. I. Cortical surface-based analysis: I. Segmentation and surface  
578 reconstruction. *NeuroImage*, 9 (2), 179-194 (1999).
- 579 49. Fischl, B., Sereno, M. I., & Dale, A. M. Cortical surface-based analysis: II: inflation, flattening, and a  
580 surface-based coordinate system. *NeuroImage*, 9 (2), 195-207 (1999).

- 581 50. Naselaris, T., Kay, K. N., Nishimoto, S., & Gallant, J. L. Encoding and decoding in fMRI. *NeuroImage*, 56  
582 (2), 400-410 (2011).
- 583 51. Nishimoto, S., Vu, A. T., Naselaris, T., Benjamini, Y., Yu, B., & Gallant, J. L. Reconstructing visual  
584 experiences from brain activity evoked by natural movies. *Current Biology*, 21 (19), 1641-1646 (2011).
- 585 52. Huth, A. G., Nishimoto, S., Vu, A. T., & Gallant, J. L. A Continuous semantic space describes the representation  
586 of thousands of object and action categories across the human brain. *Neuron*, 76 (6), 1210–1224 (2012).
- 587 53. Chi, T., Ru, P., & Shamma, S. A. Multiresolution spectrotemporal analysis of complex sounds. *The Journal of*  
588 *the Acoustical Society of America*, 118 (2), 887-906 (2005).
- 589 54. Ellis, D. P. Gammatone-like spectrograms. *web resource: [http://www.ee.columbia.](http://www.ee.columbia.edu/dpwe/resources/matlab/gammatonegram)*  
590 *edu/dpwe/resources/matlab/gammatonegram* (2009).
